# Supplementary material for: Health Inequalities in the Diverse World of Self-Employment: A Swedish National Cohort Study
Source: MDPI journal article supplement (doi:10.3390/ijerph182312301), 2021-11-23
Supplement: s1 [file s1]

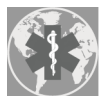

## Supplementary material

**Table S1.** Hazard ratios (95% CI) for all-cause mortality by income quintile and type of self-employment<sup>1</sup>

|                            | Regular employment |           | Sole proprietorship |           | Limited liability company |           |
|----------------------------|--------------------|-----------|---------------------|-----------|---------------------------|-----------|
|                            | HR                 | 95% CI    | HR                  | 95% CI    | HR                        | 95% CI    |
| <b>Income quintile</b>     |                    |           |                     |           |                           |           |
| 5 (highest)                | 1                  | ref       | 1.22                | 1.13-1.32 | 1.03                      | 0.97-1.09 |
| 4                          | 1.31               | 1.29-1.33 | 1.25                | 1.17-1.33 | 1.10                      | 1.04-1.17 |
| 3                          | 1.67               | 1.65-1.70 | 1.29                | 1.22-1.35 | 1.19                      | 1.12-1.26 |
| 2                          | 2.13               | 2.10-2.17 | 1.42                | 1.37-1.47 | 1.44                      | 1.36-1.53 |
| 1 (lowest)                 | 2.94               | 2.89-2.99 | 1.71                | 1.65-1.77 | 1.80                      | 1.65-1.96 |
| <b>Employment history</b>  |                    |           |                     |           |                           |           |
| Stable regular employment  | 1                  | ref       | -                   | -         | -                         | -         |
| Stable self-employment     |                    |           | 0.98                | 0.96-1.02 | 0.84                      | 0.81-0.87 |
| Self-employment following: |                    |           |                     |           |                           |           |
| unemployment               |                    |           | 1.28                | 1.22-1.35 | 1.17                      | 1.04-1.32 |
| regular employment         |                    |           | 1.01                | 0.96-1.05 | 0.86                      | 0.81-0.91 |

<sup>1</sup> Tables S1-S5 are adjusted for year of birth and gender

**Table S2.** Hazard ratios (95% CI) for all-cause inpatient care by income and type of self-employment

|                            | Regular employment |           | Sole proprietorship |           | Limited liability company |           |
|----------------------------|--------------------|-----------|---------------------|-----------|---------------------------|-----------|
|                            | HR                 | 95% CI    | HR                  | 95% CI    | HR                        | 95% CI    |
| <b>Income quintile</b>     |                    |           |                     |           |                           |           |
| 5 (highest)                | 1                  | ref       | 1.09                | 1.06-1.12 | 1.04                      | 1.02-1.06 |
| 4                          | 1.06               | 1.06-1.08 | 1.12                | 1.10-1.15 | 1.08                      | 1.06-1.10 |
| 3                          | 1.16               | 1.15-1.16 | 1.14                | 1.12-1.17 | 1.15                      | 1.12-1.17 |
| 2                          | 1.33               | 1.32-1.34 | 1.19                | 1.17-1.21 | 1.19                      | 1.16-1.22 |
| 1 (lowest)                 | 1.58               | 1.57-1.59 | 1.22                | 1.20-1.23 | 1.30                      | 1.26-1.35 |
| <b>Employment history</b>  |                    |           |                     |           |                           |           |
| Stable regular employment  | 1                  | ref       | -                   | -         | -                         | -         |
| Stable self-employment     | -                  | -         | 1.03                | 1.02-1.04 | 1.00                      | 0.99-1.02 |
| Self-employment following: |                    |           |                     |           |                           |           |
| unemployment               | -                  | -         | 1.15                | 1.13-1.18 | 1.15                      | 1.10-1.20 |
| regular employment         | -                  | -         | 1.06                | 1.05-1.07 | 1.00                      | 0.98-1.03 |

**Table S3.** Hazard ratios (95% CI) for inpatient care related to diseases of the circulatory system by income quintile and type of self-employment

|                            | Regular employment |           | Sole proprietorship |           | Limited liability company |           |
|----------------------------|--------------------|-----------|---------------------|-----------|---------------------------|-----------|
|                            | HR                 | 95% CI    | HR                  | 95% CI    | HR                        | 95% CI    |
| <b>Income quintile</b>     |                    |           |                     |           |                           |           |
| 5 (highest)                | 1                  | ref       | 1.26                | 1.06-1.51 | 1.04                      | 0.90-1.19 |
| 4                          | 1.35               | 1.29-1.40 | 1.30                | 1.12-1.51 | 1.18                      | 1.03-1.35 |
| 3                          | 1.78               | 1.70-1.84 | 1.30                | 1.15-1.46 | 1.35                      | 1.17-1.55 |
| 2                          | 2.35               | 2.26-2.44 | 1.56                | 1.44-1.70 | 1.52                      | 1.32-1.75 |
| 1 (lowest)                 | 3.29               | 3.16-3.42 | 1.74                | 1.60-1.89 | 2.30                      | 1.92-2.76 |
| <b>Employment history</b>  |                    |           |                     |           |                           |           |
| Stable regular employment  | 1                  | ref       | -                   | -         | -                         | -         |
| Stable self-employment     | -                  | -         | 0.99                | 0.93-1.06 | 0.86                      | 0.79-0.94 |
| Self-employment following: |                    |           |                     |           |                           |           |
| unemployment               | -                  | -         | 1.24                | 1.09-1.40 | 1.47                      | 1.14-1.88 |
| regular employment         | -                  | -         | 1.00                | 0.91-1.11 | 0.90                      | 0.78-1.04 |

**Table S4.** Hazard ratios (95% CI) for inpatient care related to diseases of the musculoskeletal system by income quintile and type of self-employment

|                            | Regular employment |           | Sole proprietorship |           | Limited liability company |           |
|----------------------------|--------------------|-----------|---------------------|-----------|---------------------------|-----------|
|                            | HR                 | 95% CI    | HR                  | 95% CI    | HR                        | 95% CI    |
| <b>Income quintile</b>     |                    |           |                     |           |                           |           |
| 5 (highest)                | 1                  | ref       | 0.99                | 0.67-1.45 | 1.04                      | 0.80-1.35 |
| 4                          | 1.28               | 1.18-1.37 | 1.45                | 1.10-1.91 | 1.40                      | 1.10-1.79 |
| 3                          | 1.71               | 1.59-1.83 | 1.40                | 1.09-1.72 | 1.62                      | 1.27-2.06 |
| 2                          | 2.42               | 2.26-2.60 | 1.54                | 1.31-1.80 | 2.24                      | 1.79-2.78 |
| 1 (lowest)                 | 3.65               | 3.40-3.92 | 2.09                | 1.81-2.41 | 2.50                      | 1.82-3.44 |
| <b>Employment history</b>  |                    |           |                     |           |                           |           |
| Stable regular employment  | 1                  | ref       | -                   | -         | -                         | -         |
| Stable self-employment     | -                  | -         | 1.11                | 0.98-1.25 | 1.15                      | 0.99-1.34 |
| Self-employment following: |                    |           |                     |           |                           |           |
| unemployment               | -                  | -         | 1.20                | 0.95-1.52 | 1.28                      | 0.77-2.13 |
| regular employment         | -                  | -         | 1.02                | 0.85-1.23 | 1.00                      | 0.77-1.28 |

**Table S5.** Hazard ratios (95% CI) for inpatient care related to alcohol related disorders by income quintile and type of self-employment

|                            | Regular employment |           | Sole proprietorship |           | Limited liability company |           |
|----------------------------|--------------------|-----------|---------------------|-----------|---------------------------|-----------|
|                            | HR                 | 95% CI    | HR                  | 95% CI    | HR                        | 95% CI    |
| <b>Income quintile</b>     |                    |           |                     |           |                           |           |
| 5 (highest)                | 1                  | ref       | 1.60                | 1.01-2.52 | 1.27                      | 0.88-1.83 |
| 4                          | 1.66               | 1.49-1.84 | 1.48                | 0.99-2.21 | 0.68                      | 0.41-1.14 |
| 3                          | 2.67               | 2.41-2.96 | 1.29                | 0.91-1.82 | 1.49                      | 1.00-2.20 |
| 2                          | 4.79               | 4.34-5.28 | 2.05                | 1.66-2.54 | 2.37                      | 1.67-3.37 |
| 1 (lowest)                 | 8.19               | 7.43-9.05 | 2.24                | 1.79-2.79 | 3.17                      | 1.93-5.20 |
| <b>Employment history</b>  |                    |           |                     |           |                           |           |
| Stable regular employment  | 1                  | ref       | -                   | -         | -                         | -         |
| Stable self-employment     | -                  | -         | 0.79                | 0.65-0.96 | 0.64                      | 0.49-0.85 |
| Self-employment following: |                    |           |                     |           |                           |           |
| unemployment               | -                  | -         | 1.62                | 1.23-2.14 | 1.37                      | 0.68-2.76 |
| regular employment         | -                  | -         | 0.95                | 0.73-1.24 | 0.85                      | 0.58-1.24 |
